# Supplementary material for: Inflammatory Response and Exosome Biogenesis of Choroid Plexus Organoids Derived from Human Pluripotent Stem Cells
Source: MDPI journal article supplement (doi:10.3390/ijms24087660), 2023-04-21
Supplement: s1 [file s1]

## Supplemental Materials

### Inflammatory Response and Exosome Biogenesis of Choroid Plexus Organoids Derived from Human Pluripotent Stem Cells

Laureana Muok<sup>1</sup>, Chang Liu<sup>1</sup>, Xingchi Chen<sup>1</sup>, Colin Esmonde<sup>1</sup>, Peggy Arthur<sup>2</sup>,

Xueju Wang<sup>3</sup>, Mandip Singh<sup>2</sup>, Tristan Driscoll<sup>1</sup>, Yan Li<sup>1,\*</sup>

1. Department of Chemical and Biomedical Engineering, FAMU-FSU College of Engineering, Florida State University, Tallahassee, FL 32310, USA

2. College of Pharmacy and Pharmaceutical Sciences, Florida A&M University, Tallahassee, FL 32307, USA

3. Department of Materials Science and Engineering, University of Connecticut, Storrs, CT 06268, USA

\* Correspondence: yli4@fsu.edu

**Supplemental Figure S1. The aggregate size image analysis (day 3, 7, 11, 16, 21, 28).** The growth conditions were the same for CHIR+ and CHIR- conditions during day 0-11 before CHIR was added to the culture media.

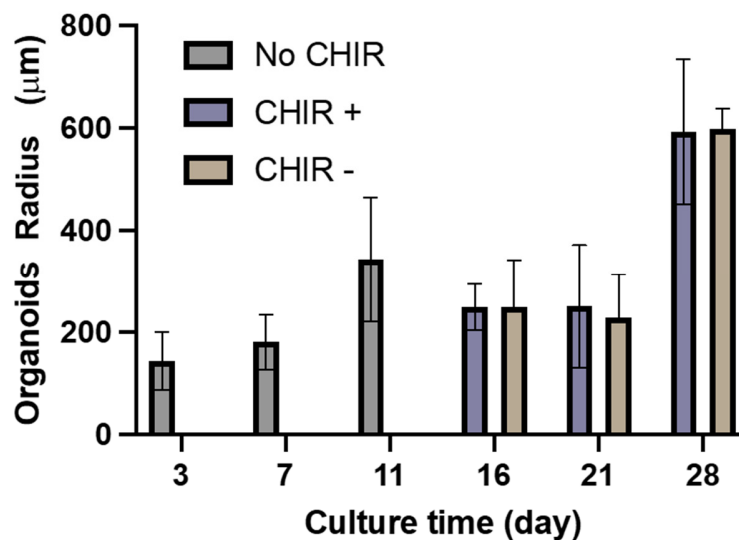

**Supplemental Figure S2. The amount of mRNA isolated for CHIR- and CHIR+ conditions.** The differentiation was initiated with the same number of the cells for the two conditions. The difference in spheroid number was evident after CHIR was added to the culture compared to no CHIR was used. The organoids from the same number of wells were used for mRNA isolation, which should come from the same number of cells at day 0. The results from three experiments were shown (Exp 1, 2, and 3).

**Exp 1**

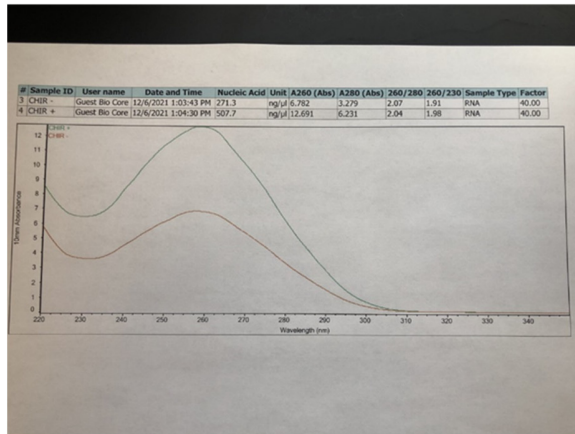

**Exp 2**

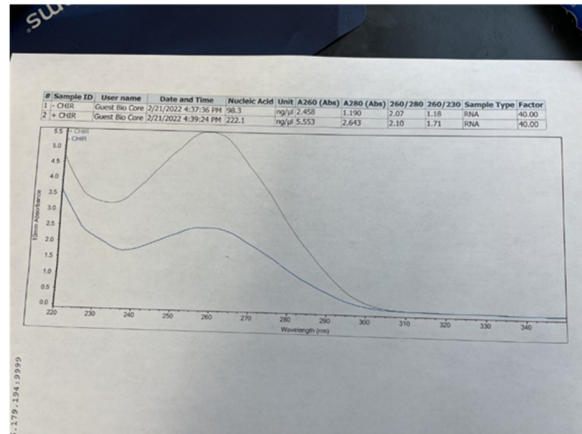

**Exp 3**

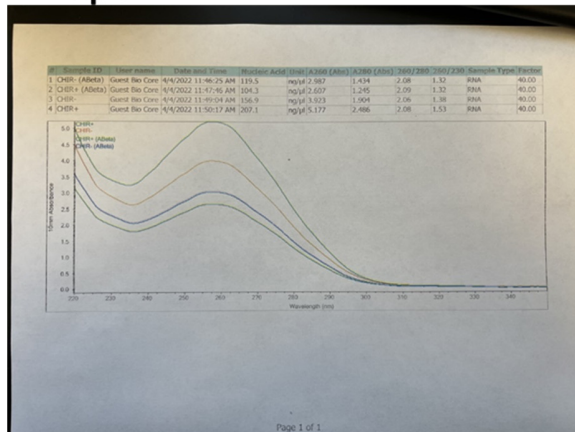

| Isolated mRNA | CHIR+/CHIR- ratio |
|---------------|-------------------|
| Exp 1         | 1.87              |
| Exp 2         | 2.26              |
| Exp 3         | 1.32              |
| Mean±SD       | 1.82±0.47         |
| Exp 3-Abeta   | 0.87              |

**Supplemental Figure S3. The Live/Dead assay images for the replated organoids to support Figure 2A. The scale bar: 50  $\mu$ m.**

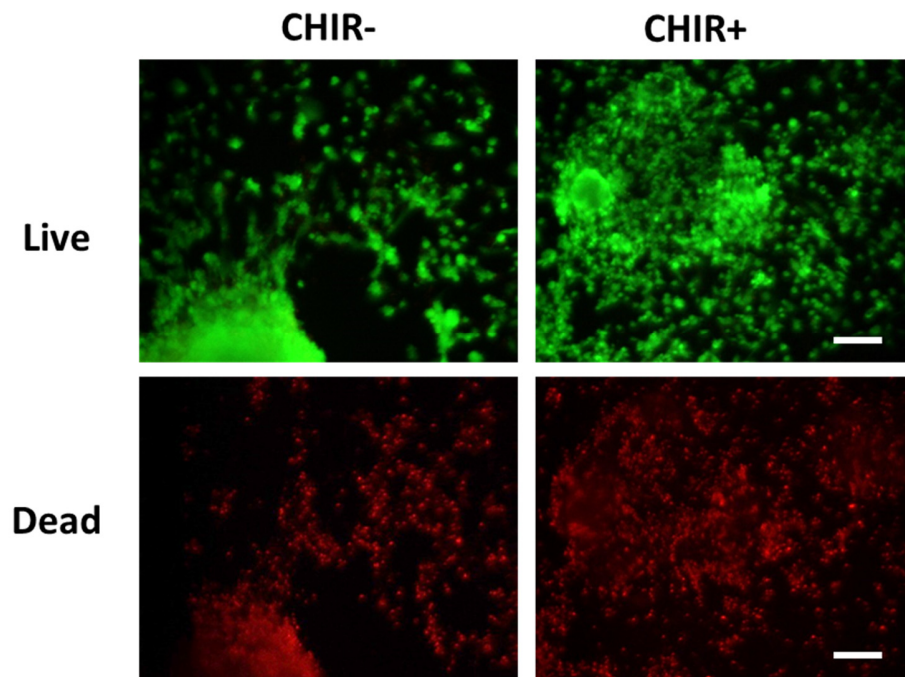

**Supplemental Figure S4. Example of SSC vs. FSC plot to show flow cytometry gating strategy for Figure 2.**

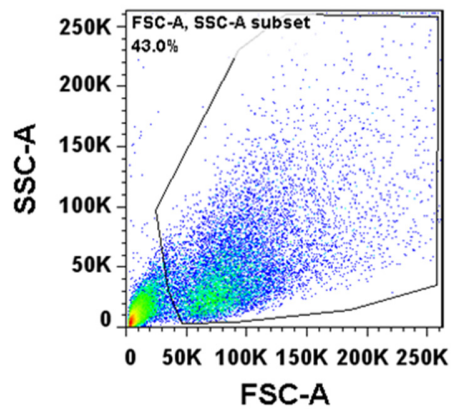

**Supplemental Figure S5. The schematic illustration of extracellular vesicle isolation procedure.** Christopher Jean-Baptiste prepared the schematic illustration of exosome isolation using BioRender.

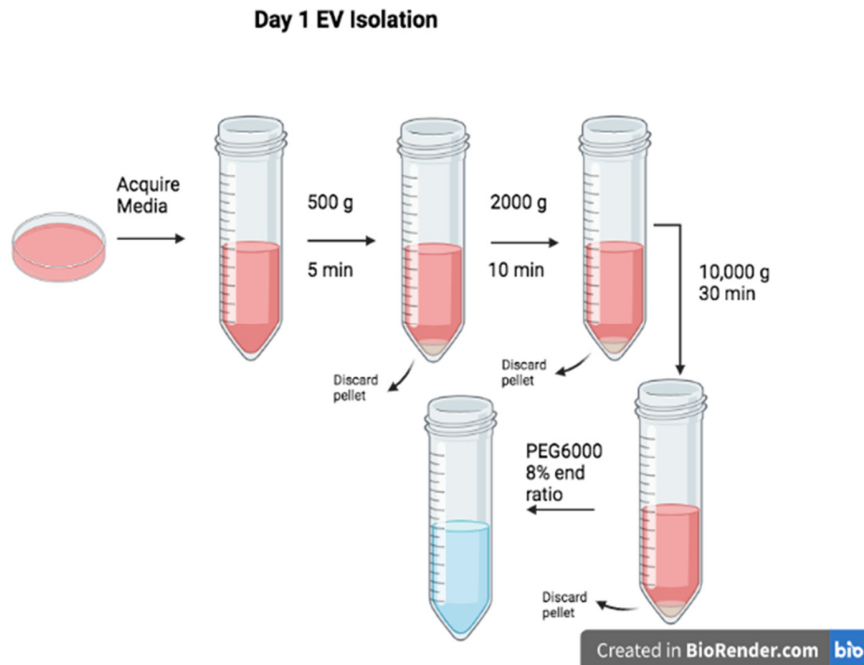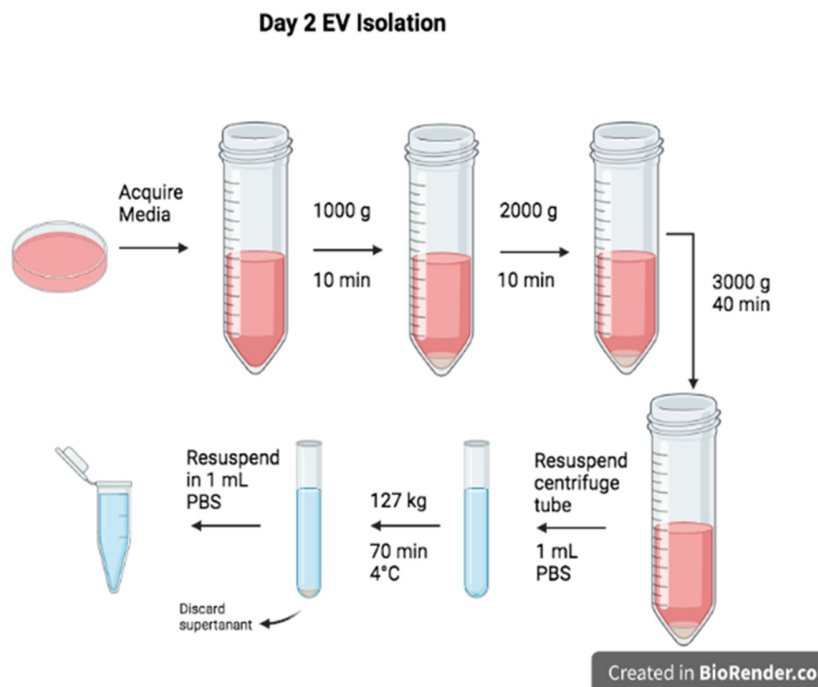

**Supplemental Figure S6. Zeta potential of ChP organoid-secreted extracellular vesicles determined by ZetaView.**

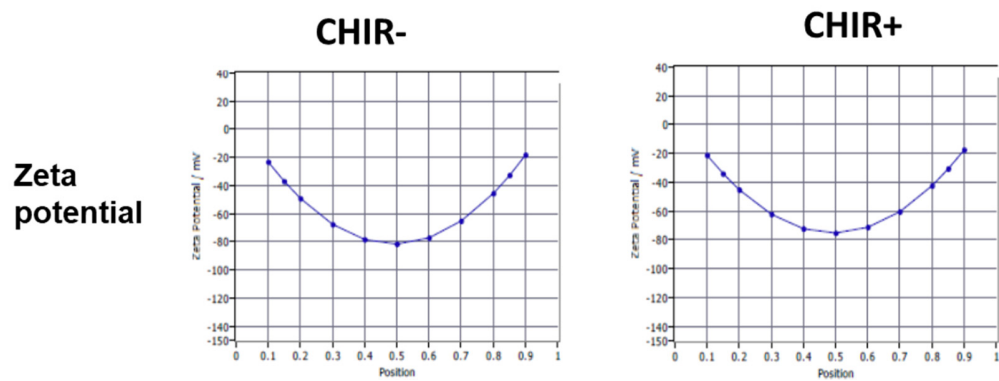

**Supplemental Table S1. Normalization of EV number to the isolated mRNA amount.**

| Parameters  | CHIR-                            | CHIR+                             | CHIR+/CHIR- ratio               |
|-------------|----------------------------------|-----------------------------------|---------------------------------|
| EV number   | $7.8 \pm 2.6 \times 10^7$ per mL | $12.6 \pm 2.7 \times 10^7$ per mL | 1.62                            |
| mRNA amount | 271 ng/ $\mu$ L (mg/mL)          | 508 ng/ $\mu$ L (mg/mL)           | 1.87                            |
| EV/mRNA     | $2.88 \pm 0.96 \times 10^5$ /mg  | $2.48 \pm 0.53 \times 10^5$ /mg   | <b>0.86<math>\pm</math>0.15</b> |

**Supplemental Table S2. ChP marker analysis for mRNA-Seq in Song et al (2019) study [39].**

Transcriptome Analysis of ChP Markers in cortical organoids. 3D forebrain organoids containing isogenic microglia-like cells (DMG) vs. microglia-like cells only (MG). the changes are expressed as Log2(DMG/MG). A positive value means upregulation in DMG group.

The meaning of these markers are explained in the main text.

| GeneName | baseMean | log2FoldChange |
|----------|----------|----------------|
| DCN      | 32827.22 | <b>3.1730</b>  |
| LUM      | 35876.97 | <b>2.7775</b>  |
| IGFBP7   | 232.5938 | <b>2.2776</b>  |
| TTR      | 2570.966 | <b>1.7943</b>  |
| CLIC6    | 23.89272 | <b>1.6367</b>  |
| MSX1     | 1182.936 | <b>1.4409</b>  |
| PLTP     | 7230.866 | <b>1.4052</b>  |
| AQP1     | 30424.8  | <b>1.1713</b>  |
| DLK1     | 5533.424 | <b>0.8398</b>  |
| PLEC     | 7382.984 | <b>0.4296</b>  |

The expression of tight junction markers: TJP1/2, CLDNs, OCLN, MPDZ; specific transporters involved in nutrient trafficking: SLC46A1, SLC23A2. Clinically relevant markers: SERPINF1-serpin family F member; PARK7-Parkinsonism associated deglycase. OTX2- early transcription factor involved in ChP development.

| GeneName        | baseMean | log2FoldChange |
|-----------------|----------|----------------|
| <b>SERPINF1</b> | 3889.831 | <b>2.3839</b>  |
| <b>TJP2</b>     | 726.8553 | <b>1.6434</b>  |
| <b>SLC46A1</b>  | 170.2765 | <b>1.5218</b>  |
| <b>TJP1</b>     | 1701.744 | <b>0.7481</b>  |
| <b>CLDN5</b>    | 23.0293  | <b>0.5514</b>  |
| <b>OCLN</b>     | 161.7074 | <b>0.1442</b>  |
| <b>PARK7</b>    | 2734.893 | <b>0.0742</b>  |
| <b>RSPO3</b>    | 755.9327 | <b>0.0302</b>  |
| <b>INADL</b>    | 505.462  | <b>0.0231</b>  |
| <b>MPDZ</b>     | 1256.236 | <b>-0.1027</b> |
| <b>SLC23A2</b>  | 1138.679 | <b>-0.1837</b> |
| <b>CLDN3</b>    | 91.25794 | <b>-0.5217</b> |
| <b>CLDN1</b>    | 120.5591 | <b>-1.4768</b> |
| <b>CA2</b>      | 343.5995 | <b>-2.1864</b> |
| <b>HTR2C</b>    | 27.34546 | <b>-6.2390</b> |
| <b>OTX2</b>     | 689.1214 | <b>-9.1203</b> |

Ciliary markers-CCDC67, ARL13B; Ciliary transcription factor: FOXJ1

Brain-derived factor-secretogranin-1 (CHGB), a neuro-endocrine secretory protein; NDRG2, an astrocyte-expressed protein that plays a role in neurite growth. C1R-complement protein. KRT17-keratin 17; TAGLIN-transgelin, expressed in a subset of cells in epithelium.

RBPs: retinol binding proteins, the more mature markers expressed in dark cells of ChP epithelium. IGF2: restricted in dark cells of ChP epithelium.

LGALS3BP: human-specific developmental secreted protein.



| GeneName | baseMean | log2FoldChange |
|----------|----------|----------------|
| CHGB     | 1920.537 | <b>2.4160</b>  |
| C1R      | 737.2601 | <b>2.3750</b>  |
| NDRG2    | 1456.452 | <b>1.5622</b>  |
| CCDC67   | 9.219291 | <b>0.9642</b>  |
| TAGLN    | 568.3037 | 0.9241         |
| ARL13B   | 222.5634 | <b>0.1401</b>  |
| KRT17    | 5.476122 | -0.4263        |
| FOXJ1    | 138.8025 | <b>-4.1214</b> |
|          |          |                |
| GeneName | baseMean | log2FoldChange |
| RBP4     | 661.1704 | <b>2.5971</b>  |
| MDK      | 11336.73 | <b>2.3416</b>  |
| RBP3     | 29.90876 | <b>2.2582</b>  |
| LGALS3BP | 6305.362 | <b>2.2219</b>  |
| IGF2     | 37271.79 | <b>2.1672</b>  |
| RBP2     | 68.89518 | <b>1.2927</b>  |
| RBP1     | 557.7267 | <b>0.9952</b>  |
| PRAP1    | 10.72332 | <b>0.0833</b>  |

**Supplemental Table S3. A list of antibodies.**

| <b>Cells</b>   | <b>Primary Antibody</b>                     | <b>Origin/ Isotype</b> | <b>Supplier/ Cat#</b>    | <b>Dilution</b> |
|----------------|---------------------------------------------|------------------------|--------------------------|-----------------|
| ChP markers    | TTR                                         | Mouse IgG1             | Abcam, ab204997          | 1:200           |
|                | CLIC6                                       | Rabbit IgG             | Abcam, ab204566          | 1:500           |
| Neuronal cells | Beta-tubulin III                            | Mouse IgG1             | Millipore, MAB1637       | 1:100           |
| Secondary      | Alexa Fluor 488,<br>goat anti-mouse<br>IgG1 | -                      | ThermoFisher,<br>A-21121 | 1:200           |
|                | Alexa Fluor 488<br>Goat Anti-rabbit<br>IgG  |                        | ThermoFisher,<br>A-11008 | 1:200           |

**Supplemental Table S4. Primer sequence for the target genes determined by RT-PCR.**

| Primer number | Gene name     | Primer name in database | Primer sequence (5'-3')   |
|---------------|---------------|-------------------------|---------------------------|
| 1             | ACTB          | Bactin F                | GTACTCCGTGTGGATCGGCG      |
|               |               | Bactin R                | AAGCATTGCGGTGGACGATGG     |
| 2             | GAPDH         | GAPDH-F                 | TCACTGCCACCCAGAAGACTG     |
|               |               | GAPDH-R                 | GGATGACCTTGCCCACAGC       |
| 3             | CLIC6         | CLIC6-F1                | GCAGTTTTACCCCAGCAGTCA     |
|               |               | CLIC6-R1                | AATCTGCCCCCTAACCAGATG     |
| 4             | PLEC          | PLEC-F1                 | CTGTAGAGGGCCCTGGTGT       |
|               |               | PLEC-R1                 | GGGGCTTCTCTGGGTAGACTG     |
| 5             | PLTP          | PLTP-F1                 | CCCTGACTGAGAGGAAGTGA      |
|               |               | PLTP-R1                 | TCCATGGCAGAGTCGAAGAAG     |
| 6             | TTR           | TTR-F1                  | TGGGAAAACCACTGAGTCTGG     |
|               |               | TTR-R1                  | GATGCCAAGTGCCTTCCAGTA     |
| 7             | IGFBP7        | IGFBP7-F1               | GGAACAAGGTAAAAAGGGGTCA    |
|               |               | IGFBP7-R1               | AGCACCCAGCCAGTTACTTCA     |
| 8             | MSX1          | MSX1-F1                 | GCCTTCCCTTTAACCCTCACA     |
|               |               | MSX1-R1                 | GGGACTCTTCCAGCCACTTTT     |
| 9             | DCN           | DCN-F1                  | GATTGTTGGTGGGAGGCACTAT    |
|               |               | DCN-R1                  | GCCTCCTTTATGCCAACCTGT     |
| 10            | LUM           | LUM-F1                  | GGCAGGCCTATTCATCACAA      |
|               |               | LUM-R1                  | AAGGTTTTGCACATCATTTGACAG  |
| 11            | DLK           | DLK1-F1                 | CTGAGAGTGTCTGGGATCCTTG    |
|               |               | DLK1-R1                 | TGGATCGCTGTCTTTGAGCTT     |
| 12            | AQP1          | AQP1-F1                 | CAGCCCAAGGACAGTTCAGAG     |
|               |               | AQP1-R1                 | TCATGGCTAAGTGCACAGTGG     |
| 13            | TNF $\alpha$  | Forward                 | TGGCCAATGGCGTGGAGCTG      |
|               |               | Reverse                 | GTAGGAGACGGCGATGCGGC      |
| 14            | IL-6          | Forward                 | GAAGCTCTTCTCCACAAGCG      |
|               |               | Reverse                 | TTTTCTGCCAGTGCCTCTTT      |
| 15            | IL-12 $\beta$ | Forward                 | CCAAGGGGTGACGTGCGGAG      |
|               |               | Reverse                 | GGTGGGTCAGGTTTGATGATGTCCC |
| 16            | CD163         | Forward                 | CCAGTCCCAAACACTGTCCT      |
|               |               | Reverse                 | ATGCCAGTGAGCTTCCCGTTCAGC  |
| 17            | TGF $\beta$   | Forward                 | CCTACATTTGGAGCCTGGAC      |
|               |               | Reverse                 | TGTCCTTAAATACAGCCCCC      |
| 18            | IL-10         | Forward                 | AAGCCTGACCACGCTTTCTA      |
|               |               | Reverse                 | ATGAAGTGGTTGGGGAATGA      |
| 19            | SMPD2-1       | SMPD2-F1                | GCCTGGGAGACTTTCTGAACC     |
|               |               | SMPD2-R1                | AAGTGGTGTGCAGCTGGGTAG     |
| 20            | SRSF5(hrs)-1  | SRSF5-F1                | CTTCTCGGATCGAGGCTTCTT     |
|               |               | SRSF5-R1                | TCGAATCAACTGCGCTCATTA     |

|    |                       |             |                          |
|----|-----------------------|-------------|--------------------------|
| 21 | TSG101                | TSG101 F    | CACCTGGTGGTCCATATCCTG    |
|    |                       | TSG101 R    | GATGGTGTCCCTCGCTGATTGT   |
| 22 | STAM1                 | STAM1-F1    | CACTGGATTTTTGGGTTGCTC    |
|    |                       | STAM1-R1    | GTGGAAAACATTTTTTCGCATGA  |
| 23 | PDCD61P<br>(ALIX)     | PDCD61P F   | TAAGTGCATCTGAGGGCCAAA    |
|    |                       | PDCD61P R   | GGGGCCTCCTTTCCTAGTTTC    |
| 24 | PDCD61Pi4<br>(ALIXI4) | PDCD61Pi4 F | TTGGCTAATCAGGCTGCAGAT    |
|    |                       | PDCD61Pi4 R | TCACATGCAAAGTAAGCAAGTGTT |
| 25 | MITF-1                | MITF-F1     | GAATTGGTGATGGGTGATGGA    |
|    |                       | MITF-R1     | TGCATGGGAACATATGCAGTTG   |
| 26 | RAB27B                | RAB27B F    | TCCATGAAGCTGCTTGTCTCA    |
|    |                       | RAB27B R    | GTTGGGTCTCCACCCAGAAAT    |
| 27 | MMP2                  | MMP2 F1     | CATCGCTCAGATCCGTGGTG     |
|    |                       | MMP2 R1     | GCATCAATCTTTTCCGGGAGC    |
| 28 | MMP3                  | MMP3 F1     | CCATCTCTTCCTTCAGGCGT     |
|    |                       | MMP3 R1     | ATGCCTCTTGGGTATCCAGC     |
| 29 | MMP9                  | MMP9-F      | GGCCACTACTGTGCCTTTGAG    |
|    |                       | MMP9-R      | AATCGCCAGTACTTCCCATCC    |
